# Supplementary material
Source: publisher figshare collection journal article supplement (https://diabetesjournals.figshare.com/articles/dataset/_/21553317)
Supplement: Supplementary file 1 [file 1]

## ONLINE SUPPLEMENTAL MATERIAL

### **GC-globulin/vitamin D-binding protein is required for pancreatic $\alpha$ cell adaptation to metabolic stress**

Katrina Vilorio<sup>1,2</sup>, Daniela Nasteska<sup>1,2</sup>, Julia Ast<sup>1,2</sup>, Annie Hasib<sup>1,2</sup>, Federica Cuzzo<sup>1,2</sup>, Silke Heising<sup>1,2</sup>, Linford J.B. Briant<sup>3</sup>, Martin Hewison<sup>1,2\*</sup>, David J. Hodson<sup>1,2,3\*</sup>

<sup>1</sup> Institute of Metabolism and Systems Research (IMSR), and Centre of Membrane Proteins and Receptors (COMPARE), University of Birmingham, Birmingham, UK.

<sup>2</sup> Centre for Endocrinology, Diabetes and Metabolism, Birmingham Health Partners, Birmingham, UK.

<sup>3</sup> Oxford Centre for Diabetes, Endocrinology and Metabolism (OCDEM), NIHR Oxford Biomedical Research Centre, Churchill Hospital, Radcliffe Department of Medicine, University of Oxford, Oxford, OX3 7LE, UK.

\*Correspondence should be addressed to:

[m.hewison@bham.ac.uk](mailto:m.hewison@bham.ac.uk), [david.hodson@ocdem.ox.ac.uk](mailto:david.hodson@ocdem.ox.ac.uk)

**Supplementary Table 1: Human islet donor characteristics.**

| <b>Record</b> | <b>Disease</b> | <b>Age</b> | <b>Sex</b> | <b>BMI</b> | <b>HbA1c</b> |
|---------------|----------------|------------|------------|------------|--------------|
| R131          | T2D            | 52         | Male       | 26         | 6.8          |
| R312          | T2D            | 52         | Female     | 27.5       | 9.3          |
| R262          | T2D            | 54         | Female     | 22.41      | 5.6          |
| R276          | T2D            | 54         | Female     | 24.4       | 7.2          |
| R063          | T2D            | 57         | Female     | 22.81      | 6.1          |
| R213          | T2D            | 57         | Male       | 23.14      | 6.7          |
| R347          | T2D            | 57         | Male       | 27.9       | 6.3          |
| R192          | T2D            | 63         | Male       | 26.87      | N/A          |
| R222          | T2D            | 62         | Male       | 25.95      | 10           |
| R146          | ND             | 52         | Male       | 25.26      | 5.5          |
| R238          | ND             | 52         | Male       | 26.05      | 5.7          |
| R158          | ND             | 53         | Male       | 22.5       | 5.5          |
| R107          | ND             | 56         | Female     | 27.5       | 9.3          |
| R303          | ND             | 56         | Female     | 24.1       | N/A          |
| R253          | ND             | 57         | Male       | 25.6       | 5            |
| R278          | ND             | 57         | Male       | 27.65      | 5.7          |
| R021          | ND             | 58         | Male       | 28.34      | N/A          |
| R117          | ND             | 64         | Male       | 25.1       | 5.8          |
| R179          | ND             | 61         | Male       | 25.1       | 5.7          |

**Supplementary Movie 1:  $\text{Ca}^{2+}$  spiking activity in Fura2-loaded high fat diet  $\text{GC}^{+/+}$  islets at 0.5 mM glucose.** Acquisition rate 2 Hz, 10 x 0.3 NA objective, epinephrine applied at frame 200 (out of 400 frames).

**Supplementary Movie 2:  $\text{Ca}^{2+}$  spiking activity in Fura2-loaded high fat diet  $\text{GC}^{-/-}$  islets at 0.5 mM glucose.** Acquisition rate 2 Hz, 10 x 0.3 NA objective, epinephrine applied at frame 200 (out of 400 frames).

**Supplementary Movie 3:  $\text{Ca}^{2+}$  spiking activity in Fluo8-loaded high fat diet  $\text{GC}^{+/+}$  islets at 0.5 mM glucose.** Acquisition rate 2 Hz, 20 x 0.75 NA objective, epinephrine applied at frame 200 (out of 400 frames).

**Supplementary Movie 4:  $\text{Ca}^{2+}$  spiking activity in Fluo8-loaded high fat diet  $\text{GC}^{-/-}$  islets at 0.5 mM glucose.** Acquisition rate 2 Hz, 20 x 0.75 NA objective, epinephrine applied at frame 200 (out of 400 frames).
